# Supplementary material for: Diet and Cardiovascular Disease Risk Among Individuals with Familial Hypercholesterolemia: Systematic Review and Meta-Analysis
Source: PubMed Central journal article supplement (PMC7468930; doi:10.3390/nu12082436), 2020-08-13
Supplement: nutrients-12-02436-s001.pdf [file nutrients-12-02436-s001.pdf]

**Table S1.** Lipid profile of subjects assigned to low-fat/low-cholesterol diet and high-fat/high-cholesterol diet.

| Variables/Trial                                  | Last Visit Levels |             |              |             |
|--------------------------------------------------|-------------------|-------------|--------------|-------------|
|                                                  | High-Fat Diet     |             | Low-Fat Diet |             |
|                                                  | N                 | Mean (SD)   | N            | Mean (SD)   |
| Chisholm 1994 [21]                               |                   |             |              |             |
| Total cholesterol, mmol/L                        | 19                | 6.36 (0.98) | 19           | 5.96 (0.75) |
| Triglycerides, mmol/L                            |                   | 1.49 (0.76) |              | 1.55 (0.78) |
| High-density lipoprotein cholesterol, mmol/L     |                   | 1.44 (0.38) |              | 1.33 (0.35) |
| Low-density lipoprotein cholesterol, mmol/L      |                   | 4.22 (0.93) |              | 3.95 (0.70) |
| Very-low-density lipoprotein cholesterol, mmol/L |                   | 0.56 (0.41) |              | 0.57 (0.37) |

SD, standard deviation.

**Table S2.** Lipid profile of subjects assigned to omega-3 fatty acids and placebo.

| Variables/Trial                                  | Last Visit Levels         |             |               |             |
|--------------------------------------------------|---------------------------|-------------|---------------|-------------|
|                                                  | Omega-3 Fatty Acids Group |             | Placebo Group |             |
|                                                  | N                         | Mean (SD)   | N             | Mean (SD)   |
| Balestrieri 1996 [11]                            |                           |             |               |             |
| Total cholesterol, mmol/L                        | 14                        | 7.75 (1.27) | 14            | 7.80 (1.14) |
| Triglycerides, mmol/L                            |                           | 1.02 (0.29) |               | 1.26 (0.66) |
| High-density lipoprotein cholesterol, mmol/L     |                           | 1.37 (0.54) |               | 1.34 (0.47) |
| Low-density lipoprotein cholesterol, mmol/L      |                           | 5.89 (1.29) |               | 5.87 (1.34) |
| Apolipoprotein A-I, g/L                          |                           | 1.27 (0.47) |               | 1.25 (0.42) |
| Apolipoprotein B100, g/L                         |                           | 2.04 (0.42) |               | 2.05 (0.42) |
| Chan 2016 [20]                                   |                           |             |               |             |
| Total cholesterol, mmol/L                        | 20                        | 4.20 (0.71) | 20            | 4.58 (1.21) |
| Triglycerides, mmol/L                            |                           | 1.05 (0.40) |               | 1.30 (0.63) |
| High-density lipoprotein cholesterol, mmol/L     |                           | 1.12 (0.22) |               | 1.19 (0.54) |
| Low-density lipoprotein cholesterol, mmol/L      |                           | 2.54 (0.71) |               | 2.81 (0.85) |
| Very-low-density lipoprotein cholesterol, mmol/L |                           | 0.57 (0.22) |               | 0.77 (0.28) |
| Apolipoprotein B100, g/L                         |                           | 0.76 (0.13) |               | 0.83 (0.27) |
| Lipoprotein (a), g/L                             |                           | 0.42 (0.45) |               | 0.44 (0.49) |
| Hande 2019 [13]                                  |                           |             |               |             |
| Total cholesterol, mmol/L                        | 34                        | 4.60 (0.80) | 34            | 5.00 (1.10) |
| Triglycerides, mmol/L                            |                           | 0.84 (0.39) |               | 1.15 (0.86) |
| High-density lipoprotein cholesterol, mmol/L     |                           | 1.4 (0.4)   |               | 1.4 (0.4)   |
| Low-density lipoprotein cholesterol, mmol/L      |                           | 2.8 (0.9)   |               | 3.2 (0.9)   |

SD, standard deviation.

**Table S3.** Lipid profile of subjects assigned to low-fat diet regimes enriched with either monounsaturated fatty acids or polyunsaturated fatty acids.

| Variables/Trial                             | Last Visit Levels   |             |                     |             |
|---------------------------------------------|---------------------|-------------|---------------------|-------------|
|                                             | Monounsaturated Fat |             | Polyunsaturated Fat |             |
|                                             | N                   | Mean (SD)   | N                   | Mean (SD)   |
| Negele 2015 [19]                            |                     |             |                     |             |
| Total cholesterol, mmol/L                   | 12                  | 5.55 (0.75) | 9                   | 6.28 (1.32) |
| Triglycerides, mmol/L                       |                     | 1.11 (0.63) |                     | 1.14 (0.54) |
| High-density lipoprotein cholesterol, mol/L |                     | 1.57 (0.24) |                     | 1.47 (0.39) |
| Low-density lipoprotein cholesterol, mol/L  |                     | 3.46 (0.55) |                     | 4.30 (1.55) |
| Apolipoprotein A-I, g/L                     |                     | 1.40 (0.23) |                     | 1.41 (0.31) |

|                          |             |             |
|--------------------------|-------------|-------------|
| Apolipoprotein B100, g/L | 1.08 (0.32) | 1.17 (0.30) |
|--------------------------|-------------|-------------|

SD, standard deviation.

**Table S4.** Lipid profile of subjects assigned to plant stanols and placebo.

| Variables/Trial                                  | Last Visit Levels   |             |               |             |
|--------------------------------------------------|---------------------|-------------|---------------|-------------|
|                                                  | Plant Stanols Group |             | Placebo Group |             |
|                                                  | N                   | Mean (SD)   | N             | Mean (SD)   |
| Gylling 1995 [16]                                | 14                  |             | 14            |             |
| Total cholesterol, mmol/L                        |                     | 6.81 (1.27) |               | 7.62 (1.20) |
| Triglycerides, mmol/L                            |                     | 0.92 (0.45) |               | 1.03 (0.49) |
| High-density lipoprotein cholesterol, mmol/L     |                     | 1.25 (0.30) |               | 1.20 (0.26) |
| Low-density lipoprotein cholesterol, mmol/L      |                     | 4.65 (1.20) |               | 5.47 (1.12) |
| Very-low-density lipoprotein cholesterol, mmol/L |                     | 0.25 (0.26) |               | 0.26 (0.22) |
| Jakulj 2006 [14]                                 | 41                  |             | 41            |             |
| Total cholesterol, mmol/L                        |                     | 6.47 (1.35) |               | 7.00 (1.49) |
| Triglycerides, mmol/L                            |                     | 0.61 (0.24) |               | 0.57 (0.31) |
| High-density lipoprotein cholesterol, mmol/L     |                     | 1.35 (0.24) |               | 1.38 (0.27) |
| Low-density lipoprotein cholesterol, mmol/L      |                     | 4.77 (1.32) |               | 5.24 (1.45) |

SD, standard deviation.

**Table S5.** Lipid profile of subjects assigned to plant sterols and placebo.

| Variables/Trial                                  | Last Visit Levels   |                  |               |                  |
|--------------------------------------------------|---------------------|------------------|---------------|------------------|
|                                                  | Plant Sterols Group |                  | Placebo Group |                  |
|                                                  | N                   | Mean (SD)        | N             | Mean (SD)        |
| Neil 2001 [15]                                   | 29                  |                  | 29            |                  |
| Total cholesterol, mmol/L                        |                     | 6.84 (1.12)      |               | 7.20 (1.04)      |
| Triglycerides, mmol/L                            |                     | 1.27 (0.65-3.80) |               | 1.29 (0.66-3.93) |
| High-density lipoprotein cholesterol, mmol/L     |                     | 1.49 (0.36)      |               | 1.43 (0.36)      |
| Low-density lipoprotein cholesterol, mmol/L      |                     | 4.65 (1.14)      |               | 4.99 (1.02)      |
| Very-low-density lipoprotein cholesterol, mmol/L |                     | 0.73 (0.30)      |               | 0.81 (0.38)      |
| Apolipoprotein A-I, g/L                          |                     | 1.41 (0.25)      |               | 1.47 (0.26)      |
| Apolipoprotein B, g/L                            |                     | 1.46 (0.33)      |               | 1.47 (0.29)      |
| Amundsen 2002 [10]                               | 38                  |                  | 38            |                  |
| Total cholesterol, mmol/L                        |                     | 6.87 (1.45)      |               | 7.48 (1.70)      |
| Triglycerides, mmol/L                            |                     | 0.80 (0.37)      |               | 0.78 (0.33)      |
| High-density lipoprotein cholesterol, mmol/L     |                     | 1.26 (0.35)      |               | 1.25 (0.31)      |
| Low-density lipoprotein cholesterol, mmol/L      |                     | 5.25 (1.55)      |               | 5.88 (1.79)      |
| Apolipoprotein A-I, g/L                          |                     | 1.32 (0.26)      |               | 1.35 (0.23)      |
| Apolipoprotein B, g/L                            |                     | 1.32 (0.35)      |               | 1.48 (0.39)      |
| De Jongh 2003 [12]                               | 41                  |                  | 41            |                  |
| Total cholesterol, mmol/L                        |                     | 6.27 (1.12)      |               | 7.06 (1.35)      |
| Triglycerides, mmol/L                            |                     | 0.85 (0.36)      |               | 0.90 (0.40)      |
| High-density lipoprotein cholesterol, mmol/L     |                     | 1.31 (0.31)      |               | 1.29 (0.29)      |
| Low-density lipoprotein cholesterol, mmol/L      |                     | 4.58 (1.13)      |               | 5.40 (1.37)      |
| Fuentes 2007 [22]                                | 30                  |                  | 30            |                  |
| Total cholesterol, mmol/L                        |                     | 5.74 (1.03)      |               | 5.84 (1.24)      |
| Triglycerides, mmol/L                            |                     | 1.08 (0.61)      |               | 1.14 (0.49)      |
| High-density lipoprotein cholesterol, mmol/L     |                     | 1.39 (0.36)      |               | 1.37 (0.36)      |
| Low-density lipoprotein cholesterol, mmol/L      |                     | 3.83 (0.96)      |               | 3.96 (1.09)      |
| Apolipoprotein A-I, g/L                          |                     | 1.46 (0.22)      |               | 1.47 (0.26)      |
| Apolipoprotein B, g/L                            |                     | 1.11 (0.21)      |               | 1.14 (0.24)      |

SD, standard deviation.

**Table S6.** Lipid profile of subjects assigned to plant stanols and plant sterols.

| Variables/Trial                              | Last Visit Levels |             |               |             |
|----------------------------------------------|-------------------|-------------|---------------|-------------|
|                                              | Stanols Group     |             | Sterols Group |             |
|                                              | N                 | Mean (SD)   | N             | Mean (SD)   |
| Ketomaki 2005 [23]                           | 18                |             | 18            |             |
| Total cholesterol, mmol/L                    |                   | 5.65 (0.93) |               | 5.71 (0.89) |
| Triglycerides, mmol/L                        |                   | 1.16 (0.51) |               | 1.05 (0.38) |
| High-density lipoprotein cholesterol, mmol/L |                   | 1.32 (0.17) |               | 1.37 (0.17) |
| Low-density lipoprotein cholesterol, mmol/L  |                   | 3.81 (0.76) |               | 3.86 (0.81) |

SD, standard deviation.

**Table S7.** Lipid profile of subjects assigned to soy protein and control group.

| Variables/Trial                                  | Last Visit Levels |             |               |             |
|--------------------------------------------------|-------------------|-------------|---------------|-------------|
|                                                  | Soy Group         |             | Control Group |             |
|                                                  | N                 | Mean (SD)   | N             | Mean (SD)   |
| Laurin 1991 [18]                                 | 9                 |             | 9             |             |
| Total cholesterol, mmol/L                        |                   | 7.89 (1.02) |               | 7.89 (1.02) |
| Triglycerides, mmol/L                            |                   | 0.80 (0.24) |               | 1.02 (0.33) |
| High-density lipoprotein cholesterol, mmol/L     |                   | 1.20 (0.21) |               | 1.15 (0.18) |
| Low-density lipoprotein cholesterol, mmol/L      |                   | 6.33 (1.02) |               | 6.29 (1.11) |
| Very-low-density lipoprotein cholesterol, mmol/L |                   | 0.35 (0.12) |               | 0.45 (0.15) |
| Apolipoprotein A-I, g/L                          |                   | 1.55 (0.09) |               | 1.59 (0.15) |
| Apolipoprotein B, g/L                            |                   | 1.44 (0.06) |               | 1.44 (0.18) |
| Helk 2019 [17]                                   | 13                |             | 13            |             |
| Total cholesterol, mmol/L                        |                   | 6.27 (0.96) |               | 6.58 (1.03) |
| Triglycerides, mmol/L                            |                   | 0.81 (0.26) |               | 0.9 (0.19)  |
| High-density lipoprotein cholesterol, mmol/L     |                   | 1.63 (0.26) |               | 1.51 (12.6) |
| Low-density lipoprotein cholesterol, mmol/L      |                   | 4.00 (0.78) |               | 4.65 (1.08) |
| Very-low-density lipoprotein cholesterol, mmol/L |                   | 0.37 (0.12) |               | 0.41 (0.09) |
| Apolipoprotein A-I, g/L                          |                   | 1.36 (0.13) |               | 1.37 (0.15) |
| Apolipoprotein B, g/L                            |                   | 1.13 (0.19) |               | 1.23 (0.21) |
| Lipoprotein (a), g/L                             |                   | 0.30 (0.29) |               | 0.59 (0.59) |

SD, standard deviation.

**Table S8.** Lipid profile of subjects assigned to increased and low protein intake.

| Variables/Trial                                  | Last Visit Levels  |             |                   |             |
|--------------------------------------------------|--------------------|-------------|-------------------|-------------|
|                                                  | High-Protein Group |             | Low-Protein Group |             |
|                                                  | N                  | Mean (SD)   | N                 | Mean (SD)   |
| Wolfe 1992 [26]                                  | 10                 |             | 10                |             |
| Total cholesterol, mmol/L                        |                    | 5.7 (0.95)  |                   | 6.1 (0.95)  |
| Triglycerides, mmol/L                            |                    | 1.7 (0.32)  |                   | 2.4 (0.95)  |
| High-density lipoprotein cholesterol, mmol/L     |                    | 0.97 (0.25) |                   | 0.89 (0.25) |
| Low-density lipoprotein cholesterol, mmol/L      |                    | 4.5 (0.63)  |                   | 4.8 (0.63)  |
| Very-low-density lipoprotein cholesterol, mmol/L |                    | 0.49 (0.25) |                   | 0.66 (0.35) |

SD, standard deviation.

**Table S9.** Lipid profile of subjects assigned to bezafibrate plus guar and bezafibrate alone.

| Variables/Trial                              | Last visit levels  |             |               |             |
|----------------------------------------------|--------------------|-------------|---------------|-------------|
|                                              | Intervention group |             | Placebo group |             |
|                                              | N                  | Mean (SD)   | N             | Mean (SD)   |
| Wirth 1982 [24]                              | 12                 |             | 12            |             |
| Total cholesterol, mmol/L                    |                    | 8.52 (1.78) |               | 9.09 (1.99) |
| Triglycerides, mmol/L                        |                    | 1.87 (0.49) |               | 1.46 (0.79) |
| High-density lipoprotein cholesterol, mmol/L |                    | 1.24 (0.33) |               | 1.42 (0.38) |

|                                             |             |             |
|---------------------------------------------|-------------|-------------|
| Low-density lipoprotein cholesterol, mmol/L | 6.08 (1.91) | 7.91 (1.81) |
| Apolipoprotein A-I, g/L                     | 1.21 (0.1)  | 1.17 (0.12) |
| Apolipoprotein B, g/L                       | 1.55 (0.17) | 2.05 (0.21) |

SD, standard deviation.
